# Supplementary material
Source: publisher figshare collection journal article supplement (https://frontiersin.figshare.com/ndownloader/files/24744662)
Supplement: Supplementary file [file 24744662]

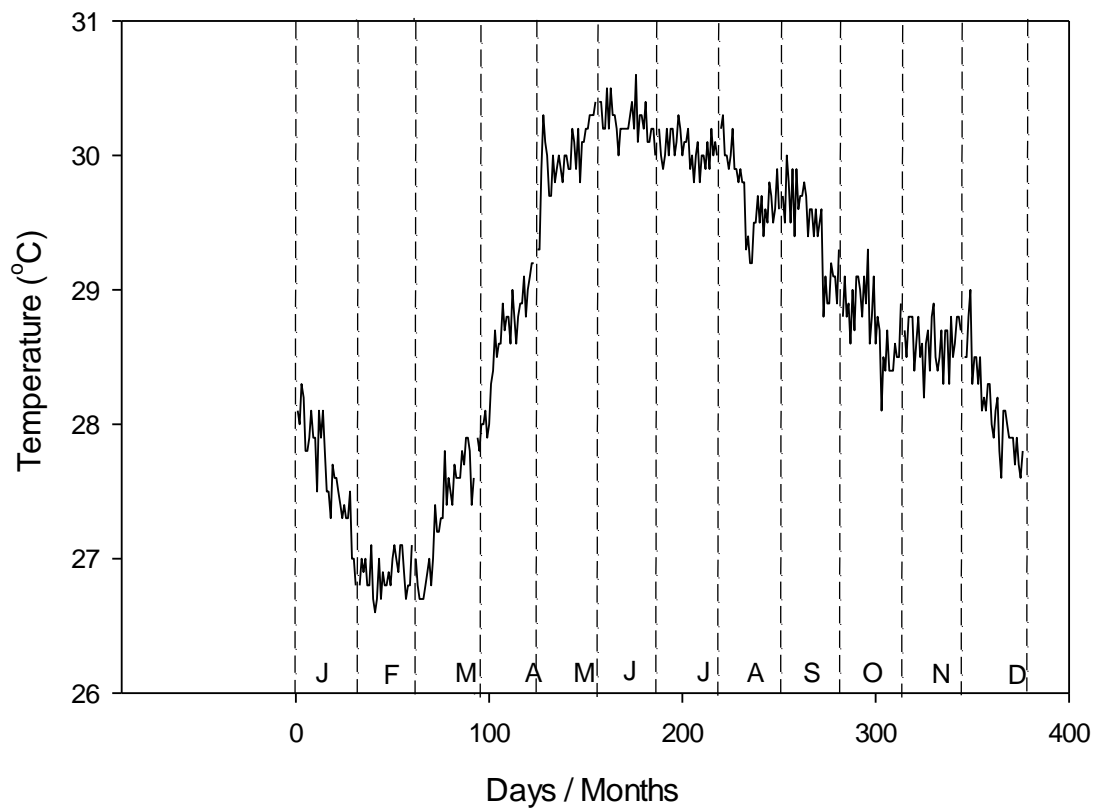

**Supplementary Figure 1.** Daily seawater temperature in Brunei (2019) (Brunei Weather Bureau). Published studies suggest a 25-29.5°C range recorded at 50 m depth off Brunei (Johari and Akhir, 2019) and 25.2 – 30.5°C (11 m) range, at inshore coral reefs (Lane, 2011)
